# Supplementary material for: Prion Uptake in the Gut: Identification of the First Uptake and Replication Sites
Source: PubMed Central journal article supplement (PMC3245311; doi:10.1371/journal.ppat.1002449), 2011-12-22
Supplement: ppat.1002449.s008.pdf [file ppat.1002449.s008.pdf]

Ferritin light chain (*Ftl1*) is expressed at high levels by macrophages

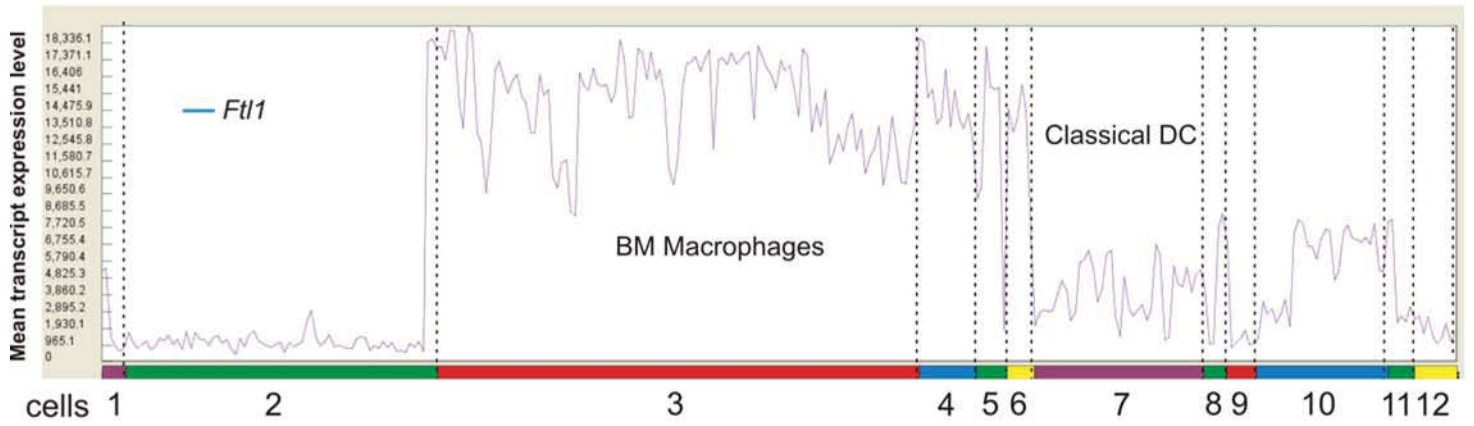

Major histocompatibility complex class II invariant chain (*Cd74*) is expressed at high levels by classical DC

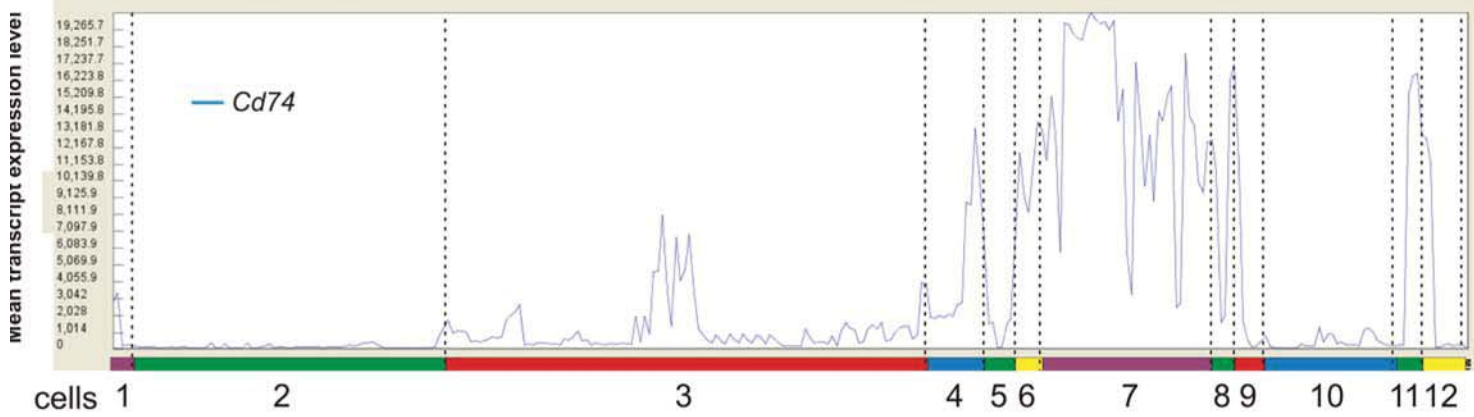

CD11c (*Itgax*) is expressed at high levels by classical DC

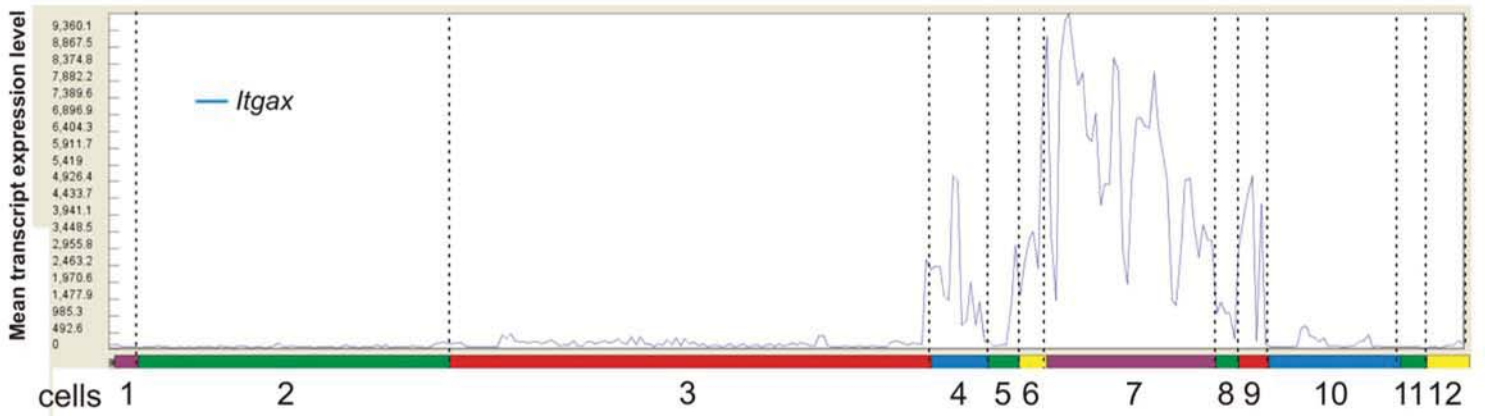

Fig. S8
