# Supplementary material for: Prion Uptake in the Gut: Identification of the First Uptake and Replication Sites
Source: PubMed Central journal article supplement (PMC3245311; doi:10.1371/journal.ppat.1002449), 2011-12-22

Fig. S11

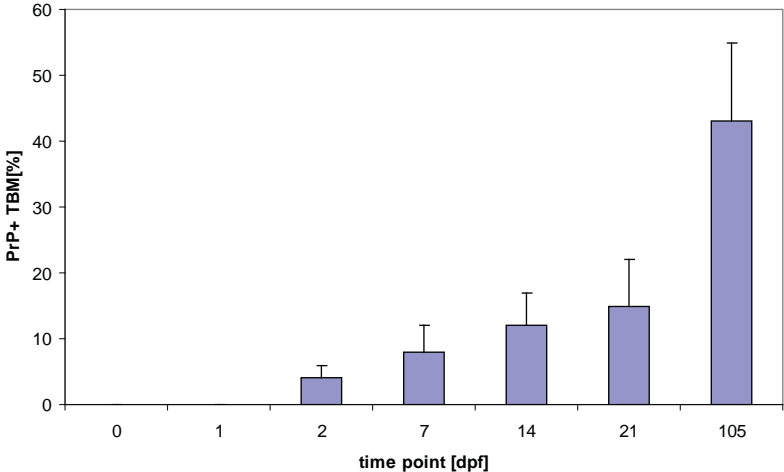

Supplement: ppat.1002449.s011.pdf [file ppat.1002449.s011.pdf]
