# Supplementary material for: Prion Uptake in the Gut: Identification of the First Uptake and Replication Sites
Source: PubMed Central journal article supplement (PMC3245311; doi:10.1371/journal.ppat.1002449), 2011-12-22
Supplement: ppat.1002449.s013.pdf [file ppat.1002449.s013.pdf]

Fig. S13

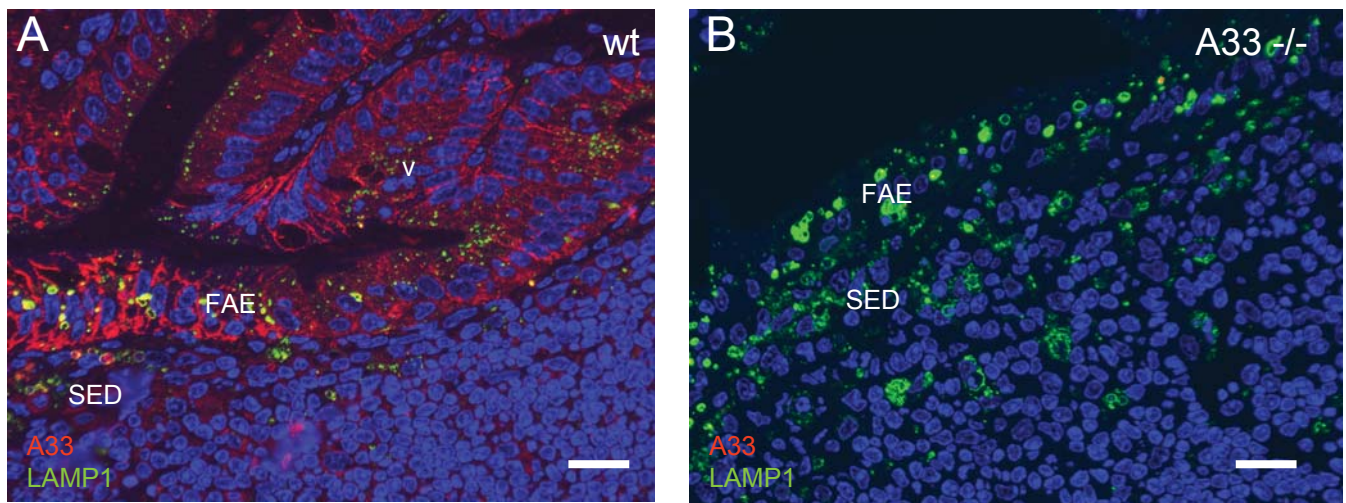

**C** Label (gold average per 100  $\mu\text{m}^2 \pm \text{SD}$ ) wild type and A33  $-/-$  mice in germinal centres.

|           | anti-A33+ PAG | PAG only   |
|-----------|---------------|------------|
| wt        | $112 \pm 11$  | $8 \pm 4$  |
| A33 $-/-$ | $11 \pm 5$    | $12 \pm 6$ |
